# Supplementary material for: Highly enantioselective bioreduction of 1-(3,4-difluorophenyl)-3-nitropropan-1-one: key intermediate of ticagrelor
Source: Royal Society of Chemistry journal article supplement (doi:10.1039/c5ra25948g), 2016-01-01
Supplement: c5ra25948g1.pdf [file c5ra25948g1.pdf]

## Supplementary Information

### **Highly enantioselective bioreduction of 1-(3,4-difluorophenyl)-3-nitropropan-1-one: Key intermediate of Ticagrelor**

Manpreet Singh<sup>1</sup>, Hare Krishnen<sup>1</sup>, Goverdhan Gilla<sup>1</sup>, Kavitha Charugondla<sup>1</sup>, Karen Holt-Tiffin<sup>2</sup> and Rakeshwar Bandichhor<sup>1\*</sup>

\*Corresponding author. Telephone: +91 40 44346430

Fax: +91 40 44346164

E-mail: rakeshwarb@drreddys.com

## Table of contents

|                                                                                  |    |
|----------------------------------------------------------------------------------|----|
| Scheme 1 .....                                                                   | 3  |
| 1. HPLC Methods .....                                                            | 4  |
| a) Purity by HPLC: Standard .....                                                | 4  |
| b) Purity by HPLC: 1-(3,4-difluorophenyl)-3-nitropropan-1-ol.....                | 5  |
| c) Chiral HPLC: Standards (1) (2) and (6).....                                   | 6  |
| d) Chiral HPLC: Preparative batch sample .....                                   | 7  |
| 2. NMR spectra.....                                                              | 8  |
| a) <sup>1</sup> H-NMR spectra: 1-(3,4-Difluorophenyl)-3-nitropropan-1-one .....  | 8  |
| b) <sup>13</sup> H-NMR spectra: 1-(3,4-Difluorophenyl)-3-nitropropan-1-one ..... | 9  |
| c) <sup>1</sup> H-NMR spectra: 1-(3,4-difluorophenyl)-3-nitropropan-1-ol.....    | 10 |
| 3. Mass Spectrum: 1-(3,4-difluorophenyl)-3-nitropropan-1-ol.....                 | 11 |
| 4. IR Spectrum: (S)-1-(3,4-difluorophenyl)-3-nitropropan-1-ol .....              | 12 |

### Scheme 1

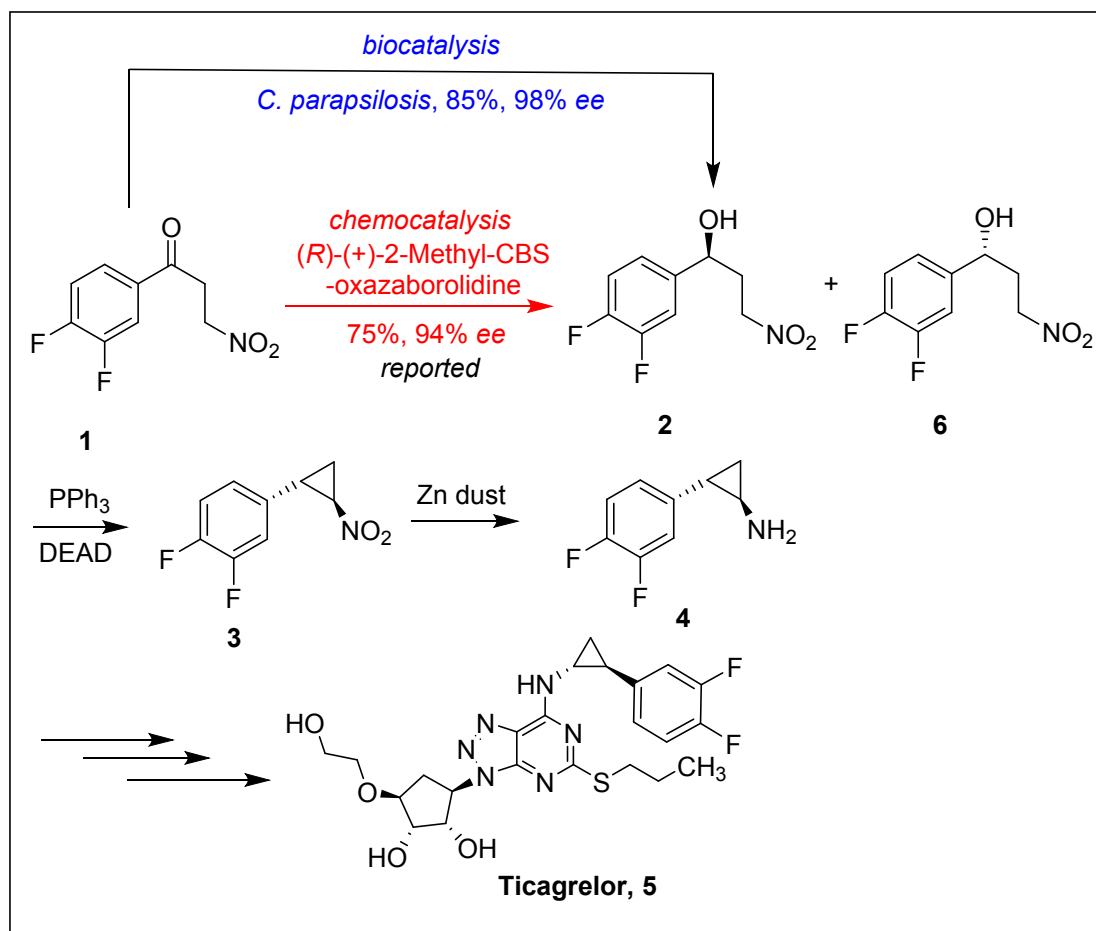

## 1. HPLC Methods

### a) Purity by HPLC: Standard

Determined by HPLC using Zorbex Eclipse Plus C-18 at 210 nm. Mobile phase consisted of A: 0.02 M  $\text{KH}_2\text{PO}_4$  buffer pH 3.0 and B: ACN:H<sub>2</sub>O (90:10 v/v).

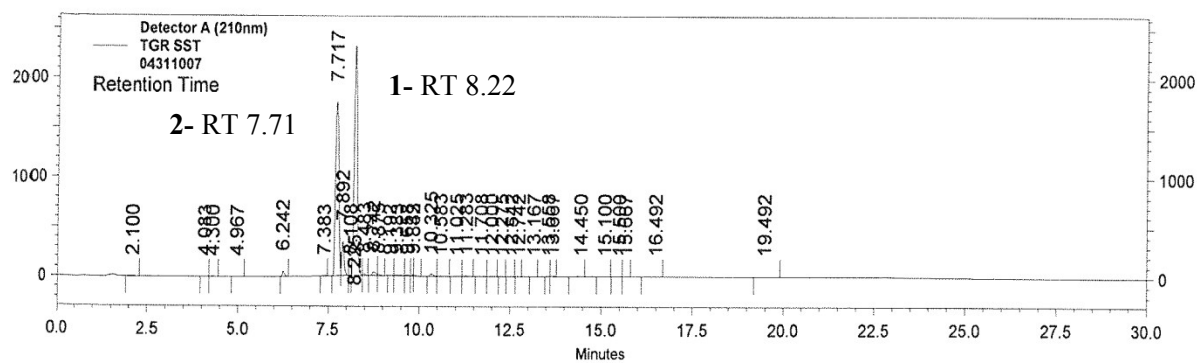

**Figure S1:** HPLC spectrum of standard substrate (1) and product (2).

**b) Purity by HPLC: 1-(3,4-difluorophenyl)-3-nitropropan-1-ol**

Determined by HPLC using Zorbex Eclipse Plus C-18 at 210 nm. Mobile phase consisted of A: 0.02 M  $\text{KH}_2\text{PO}_4$  buffer pH 3.0 and B: ACN:H<sub>2</sub>O (90:10 v/v).

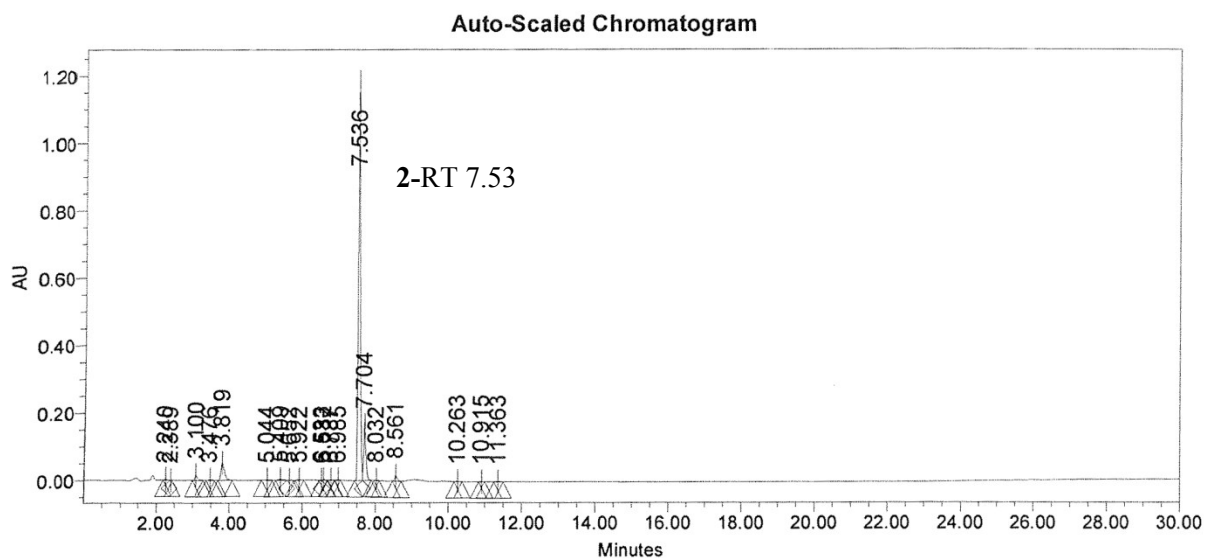

**Figure S2:** HPLC spectrum of preparative scale batch 1-(3,4-difluorophenyl)-3-nitropropan-1-ol (**2**).

**c) Chiral HPLC: Standards (1) (2) and (6)**

Determined by using chiral HPLC column Chiralcel OD-H at 210 nm. Mobile phase consisted of Hexane/*i*PrOH/TFA (92:7.9:0.1).

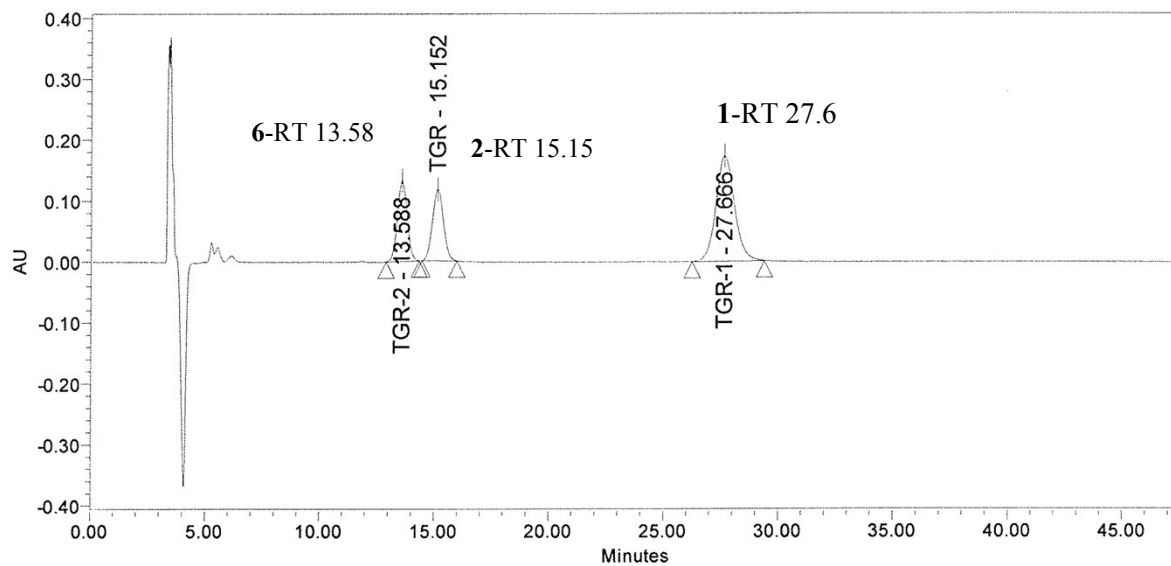

**Figure S3:** Chiral HPLC spectrum of standard (1) (2) and (6).

**d) Chiral HPLC: Preparative batch sample**

Determined by using chiral HPLC column Chiralcel OD-H at 210 nm. Mobile phase consisted of Hexane/iPrOH/TFA (92:7.9:0.1).

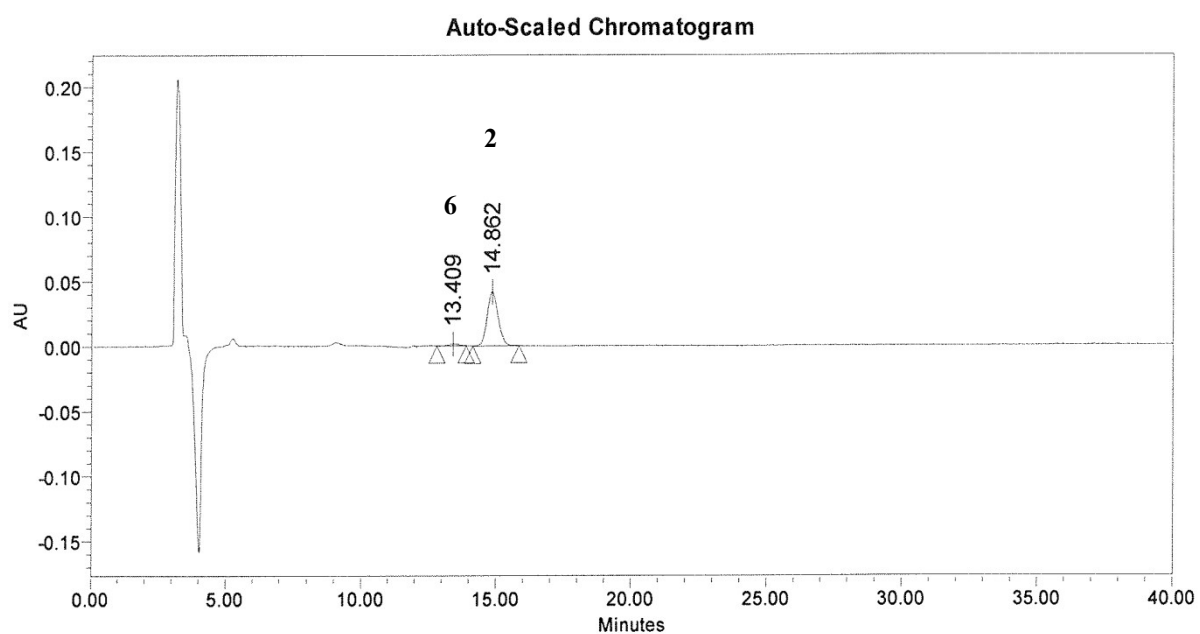

**Figure S4:** Chiral HPLC spectrum of preparative batch showing (1), (2) and (6)

## 2. NMR spectra

### a) <sup>1</sup>H-NMR spectra: 1-(3,4-Difluorophenyl)-3-nitropropan-1-one

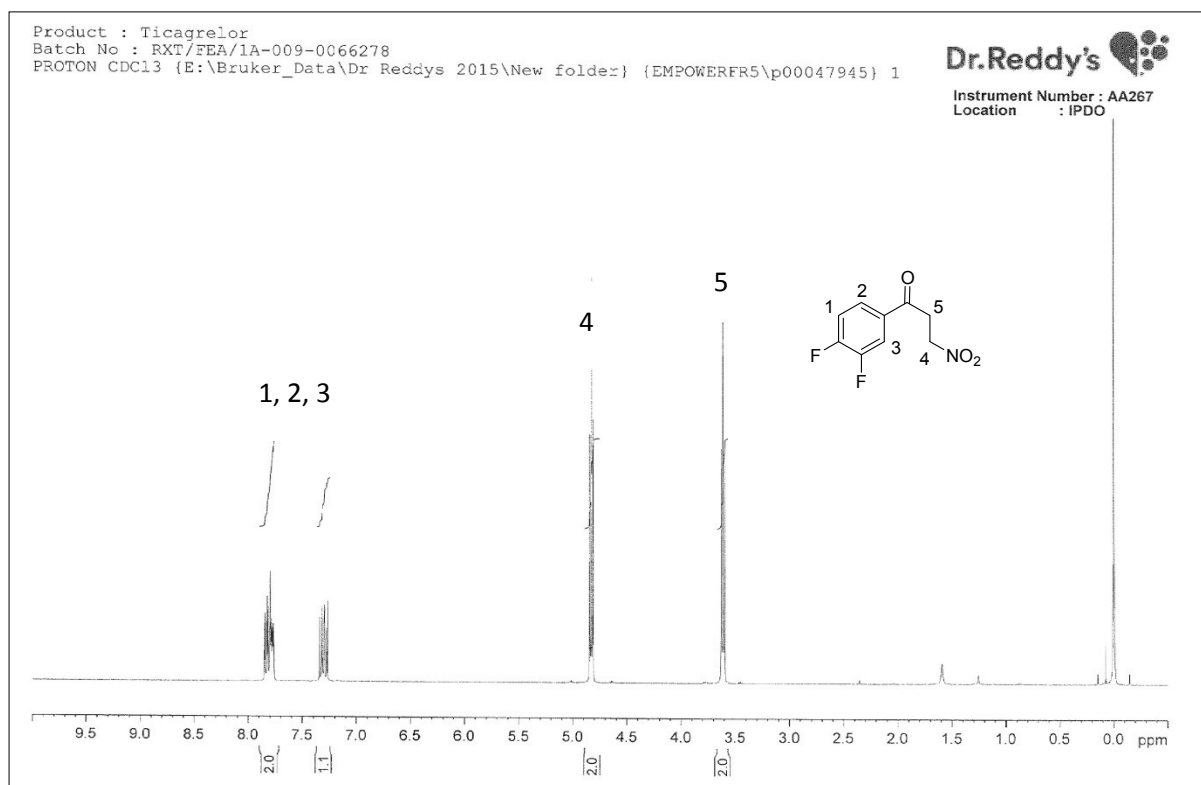

**Figure S5:** <sup>1</sup>H NMR spectrum of 1-(3,4-difluorophenyl)-3-nitropropan-1-one in CDCl<sub>3</sub>.



b)  $^{13}\text{H-NMR}$  spectra: 1-(3,4-Difluorophenyl)-3-nitropropan-1-one

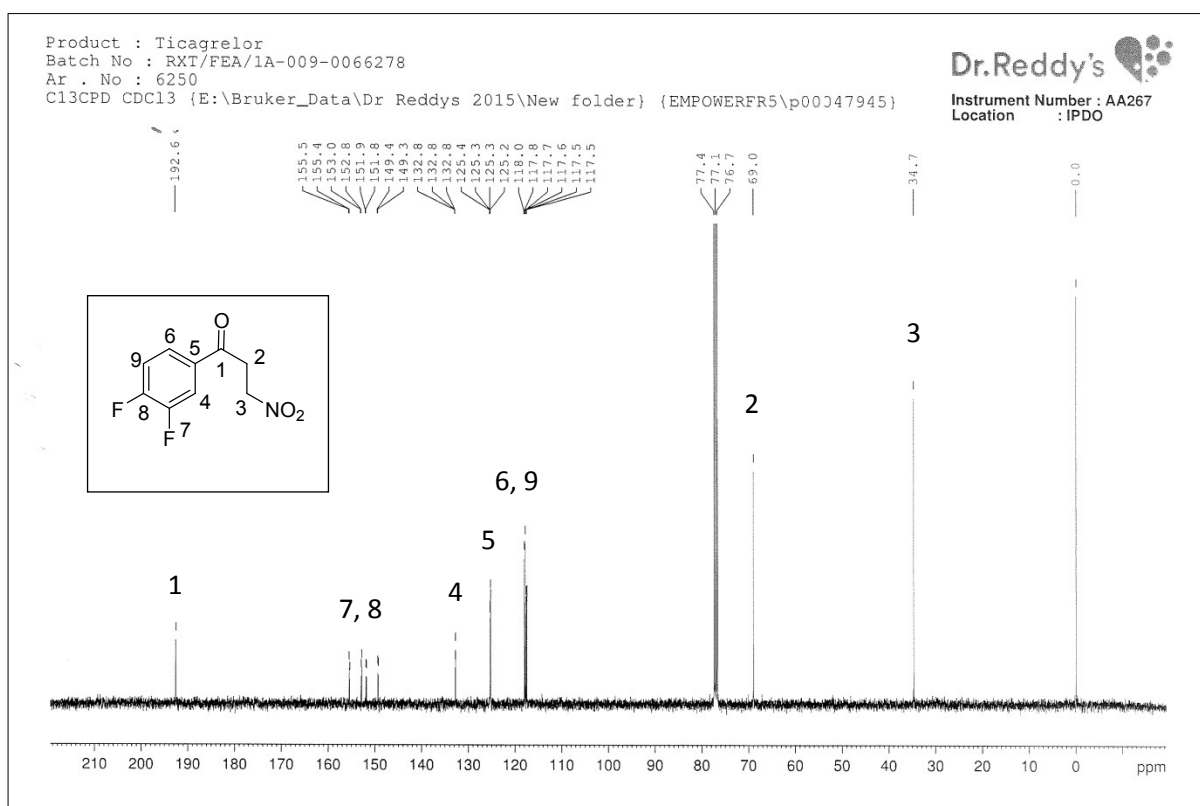

Figure S6:  $^{13}\text{C}$  NMR spectrum of (S)-1-(3,4-difluorophenyl)-3-nitropropan-1-ol in  $\text{CDCl}_3$ .

c)  $^1\text{H}$ -NMR spectra: 1-(3,4-difluorophenyl)-3-nitropropan-1-ol

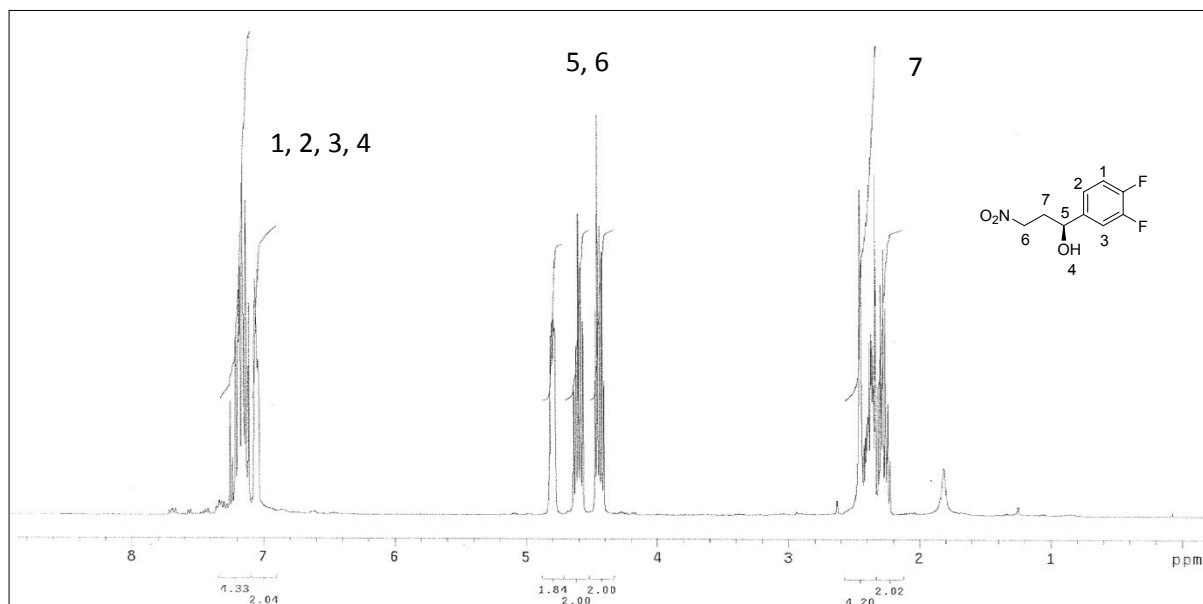

**Figure S7:**  $^1\text{H}$  NMR spectrum of (S)-1-(3,4-difluorophenyl)-3-nitropropan-1-ol in  $\text{CDCl}_3$ .

### 3. Mass Spectrum: 1-(3,4-difluorophenyl)-3-nitropropan-1-ol

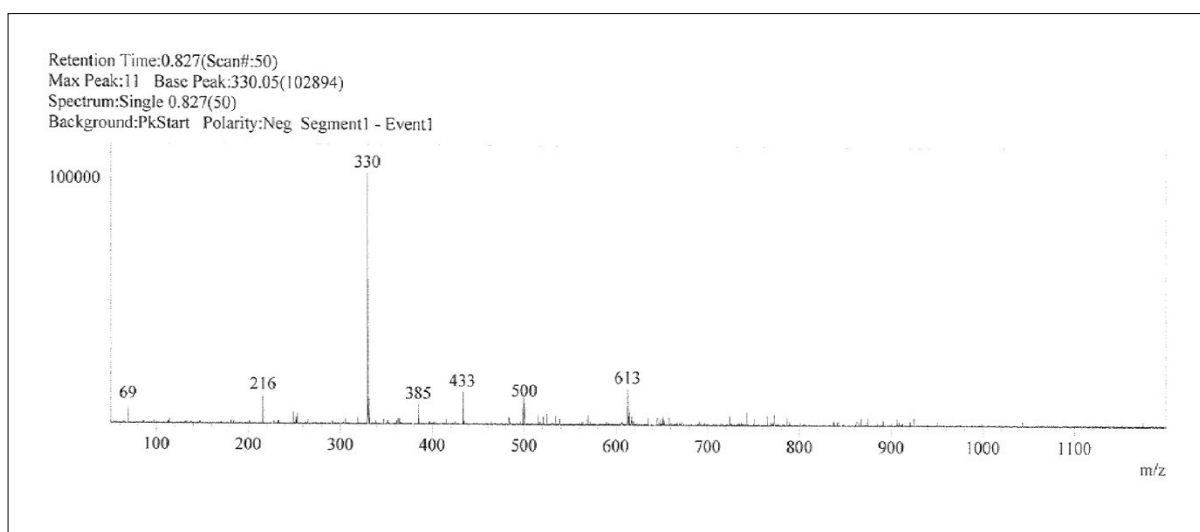

**Figure S8:** Mass (M-H) spectrum of (*S*)-1-(3,4-difluorophenyl)-3-nitropropan-1-ol.

#### 4. IR Spectrum: (S)-1-(3,4-difluorophenyl)-3-nitropropan-1-ol

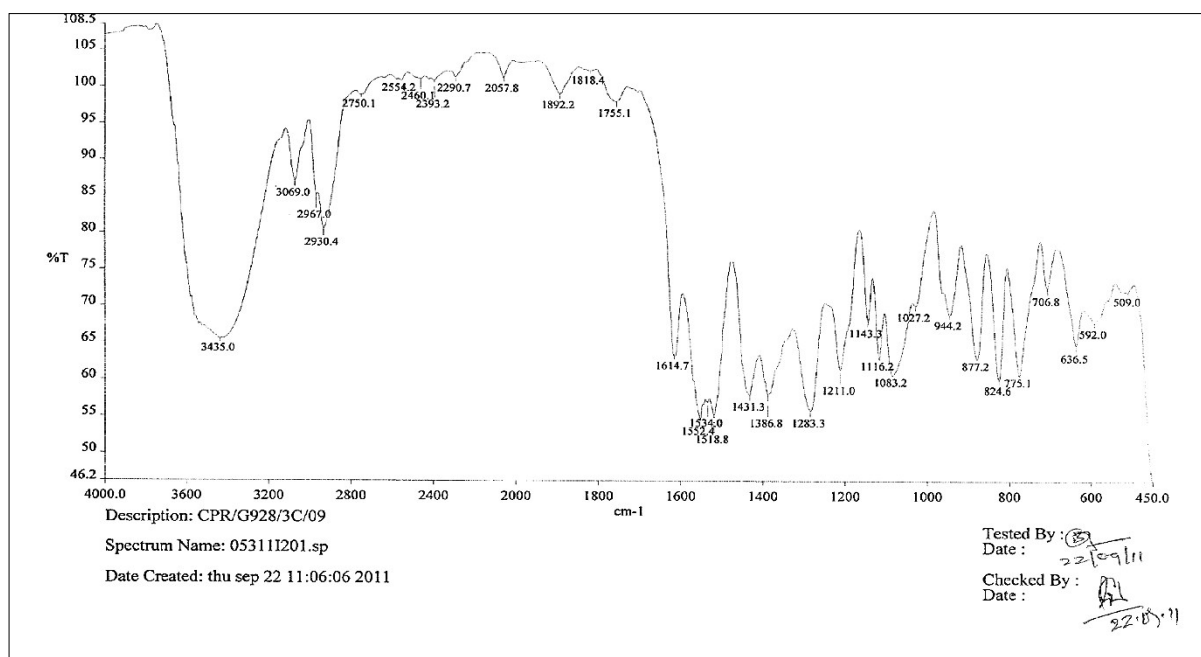

Figure S9: IR spectrum of (S)-1-(3,4-difluorophenyl)-3-nitropropan-1-ol.
